# Supplementary material for: Predictors of Influenza Vaccination among Chinese Middle School Students Based on the Health Belief Model: A Mixed-Methods Study
Source: MDPI journal article supplement (doi:10.3390/vaccines10111802), 2022-10-26
Supplement: s1 [file s1]

**The items based on HBM**

| Dimensions               | No | Questions                                                                                                                   | 1 | 2 | 3 | 4 | 5 |
|--------------------------|----|-----------------------------------------------------------------------------------------------------------------------------|---|---|---|---|---|
| Perceived susceptibility | A1 | I belong to a susceptible group                                                                                             |   |   |   |   |   |
|                          | A2 | I had friends and family whoever had flu                                                                                    |   |   |   |   |   |
|                          | A3 | Influenza vaccination is very important                                                                                     |   |   |   |   |   |
| Perceived benefits       | B1 | Influenza vaccine will help us free of influenza                                                                            |   |   |   |   |   |
|                          | B2 | Influenza vaccine will help me avoid missing class because of illness                                                       |   |   |   |   |   |
|                          | B3 | Influenza vaccine will help save my parents' time to care for me                                                            |   |   |   |   |   |
|                          | B4 | Influenza vaccine can protect my family from infection                                                                      |   |   |   |   |   |
| Perceived barriers       | C1 | I am worried about adverse reactions after the influenza vaccination                                                        |   |   |   |   |   |
|                          | C2 | I refused to get vaccinated because I was afraid of needles' prick                                                          |   |   |   |   |   |
|                          | C3 | Vaccination may take up my class time                                                                                       |   |   |   |   |   |
|                          | C4 | Family members will not be present during vaccination                                                                       |   |   |   |   |   |
|                          | C5 | The inoculation site is noisy and make me feel uncomfortable.                                                               |   |   |   |   |   |
|                          | C6 | Medical staff are not friendly                                                                                              |   |   |   |   |   |
|                          | C7 | My classmates would observe me and I would feel embarrassed                                                                 |   |   |   |   |   |
| Cues to action           | D1 | The medical staff told me that the influenza vaccine is good for me and I should be vaccinated                              |   |   |   |   |   |
|                          | D2 | According to CDC public service announcement that the influenza vaccine is good for me and I should be vaccinated           |   |   |   |   |   |
|                          | D3 | TV news, WeChat subscriptions and other mass media say that the influenza vaccine is good for me and I should be vaccinated |   |   |   |   |   |
| Self-efficacy            | E1 | When I openly discuss vaccination with others, I may positively influence others in their beliefs in vaccination            |   |   |   |   |   |
|                          | E2 | When I openly discuss vaccination with others, they may positively influence me                                             |   |   |   |   |   |
|                          | E3 | I tend to listen to my parents about vaccinating or not.                                                                    |   |   |   |   |   |

1“strongly disagree”; 2“disagree”;3“not sure”; 4“agree”; 5“strongly agree”.
